# Supplementary material for: Re-wiring the regulation of the formicamycin biosynthetic gene cluster to enable the development of promising antibacterial compounds
Source: PubMed Central journal article supplement — Cell Chem Biol. 2021 Apr 15;28(4):515–523.e5. doi: 10.1016/j.chembiol.2020.12.011 (PMC8062789; doi:10.1016/j.chembiol.2020.12.011), 2021-04-15

**Cell Chemical Biology, Volume 28**

**Supplemental information**

**Re-wiring the regulation of the formicamycin  
biosynthetic gene cluster to enable the development  
of promising antibacterial compounds**

**Rebecca Devine, Hannah P. McDonald, Zhiwei Qin, Corinne J. Arnold, Katie Noble, Govind Chandra, Barrie Wilkinson, and Matthew I. Hutchings**

## Supporting information

### GUS assay results from *for* BGC promoters

**Table S1:** The activities of *for* gene cluster promoters were measured by fusing the promoters upstream of the  $\beta$ -glucuronidase reporter gene in pMF96. Activity of  $\beta$ -glucuronidase was measured by hydrolysis of PNPG using absorbance at 420 nm as described in **Method Details: GUS assay**.

| Strain Name                                           | Mean Miller Units/ mg protein $\pm$ Standard Error |
|-------------------------------------------------------|----------------------------------------------------|
| <i>S. formicae</i> WT pMF96                           | 0.37 $\pm$ 1.10                                    |
| <i>S. formicae</i> WT pMF23                           | 91.75 $\pm$ 21.75                                  |
| <i>S. formicae</i> $\Delta$ <i>forJ</i> pMF96         | 0.00 $\pm$ 1.67                                    |
| <i>S. formicae</i> $\Delta$ <i>forJ</i> pMF23         | 86.98 $\pm$ 18.81                                  |
| <i>S. formicae</i> $\Delta$ <i>forGF</i> pMF96        | 2.01 $\pm$ 2.49                                    |
| <i>S. formicae</i> $\Delta$ <i>forGF</i> pMF23        | 100.83 $\pm$ 12.22                                 |
| <i>S. formicae</i> $\Delta$ <i>forZ</i> pMF96         | 0.37 $\pm$ 0.56                                    |
| <i>S. formicae</i> $\Delta$ <i>forZ</i> pMF23         | 94.44 $\pm$ 16.37                                  |
| <i>S. formicae</i> WT <i>pforJ</i>                    | 32.82 $\pm$ 12.83                                  |
| <i>S. formicae</i> $\Delta$ <i>forJ</i> <i>pforJ</i>  | 84.85 $\pm$ 10.05                                  |
| <i>S. formicae</i> WT <i>pforG</i>                    | 50.56 $\pm$ 14.34                                  |
| <i>S. formicae</i> $\Delta$ <i>forGF</i> <i>pforG</i> | 26.68 $\pm$ 8.11                                   |
| <i>S. formicae</i> WT <i>pforH</i>                    | 33.62 $\pm$ 12.52                                  |
| <i>S. formicae</i> $\Delta$ <i>forGF</i> <i>pforH</i> | 11.86 $\pm$ 5.07                                   |
| <i>S. formicae</i> WT <i>pforZ</i>                    | 0.38 $\pm$ 1.65                                    |
| <i>S. formicae</i> $\Delta$ <i>forZ</i> <i>pforZ</i>  | 11.41 $\pm$ 7.68                                   |

**Table S2:** Media used in this study, related to **Method Details**.

| <b>Media</b> | <b>Recipe (per litre)</b>                                                                                 | <b>Water</b>        | <b>pH</b> |
|--------------|-----------------------------------------------------------------------------------------------------------|---------------------|-----------|
| SFM          | 20 g soy flour<br>20 g mannitol<br>20 g agar                                                              | Tap                 |           |
| MYM          | 4 g maltose<br>4 g yeast extract<br>10 g malt extract<br>+/- 18 g agar                                    | 50:50 Tap:deionised | 7.3       |
| LB           | 10 g tryptone<br>5 g yeast extract<br>10 g NaCl (omitted when selecting with Hygromycin)<br>+/- 20 g agar | Deionised           | 7.5       |
| 2YT          | 16 g tryptone<br>10 g yeast extract<br>5 g NaCl                                                           | Deionised           | 7.0       |

**Table S3:** Bacterial strains used and generated in this study, related to **Experimental Model and subject details.**

| Strain                                                                  | Description/Genotype                                                                                                                                                                                         | Plasmid | Resistance                         | Reference/Source                 |
|-------------------------------------------------------------------------|--------------------------------------------------------------------------------------------------------------------------------------------------------------------------------------------------------------|---------|------------------------------------|----------------------------------|
| <i>E. coli</i> Top10                                                    | F <sup>-</sup> <i>mcrA</i> Δ( <i>mrr-hsdRMS-mcrBC</i> ) Φ80 <i>lacZ</i> ΔM15 Δ <i>lacX74 recA1 araD139 Δ(ara leu) 7697 galU galK rpsL (StrR) endA1 nupG</i>                                                  |         |                                    | Invitrogen™                      |
| <i>E. coli</i> BW25113                                                  | λ <sup>-</sup> , Δ( <i>araD-araB</i> )567, Δ <i>lacZ</i> 4787(:: <i>rrnB-4</i> ), <i>lacI</i> p-4000( <i>lacIQ</i> ), <i>rpoS</i> 369( <i>Am</i> ), <i>rph-1</i> , Δ( <i>rhaD-rhaB</i> )568, <i>hsdR</i> 514 | pIJ790  | CmI <sup>R</sup>                   | (Datsenko and Wanner, 2000)      |
| <i>E. coli</i> ET12567                                                  | <i>dam</i> <sup>-</sup> <i>dcm</i> <sup>-</sup> <i>hsdS</i> <sup>-</sup>                                                                                                                                     | pUZ8002 | CmI <sup>R</sup> /Tet <sup>R</sup> | (MacNeil <i>et al.</i> , 1992)   |
| <i>S. formicae</i> wild-type                                            |                                                                                                                                                                                                              |         |                                    | Lab stock                        |
| MSSA                                                                    | ATCC 6538P                                                                                                                                                                                                   |         |                                    | American Type Culture Collection |
| MRSA                                                                    | ATCC BAA-1717                                                                                                                                                                                                |         |                                    | American Type Culture Collection |
| <i>S. formicae</i> Δ <i>forJ</i>                                        | <i>forJ</i> deletion strain                                                                                                                                                                                  |         |                                    | This work                        |
| <i>S. formicae</i> Δ <i>forGF</i>                                       | <i>forGF</i> deletion strain                                                                                                                                                                                 |         |                                    | This work                        |
| <i>S. formicae</i> Δ <i>forZ</i>                                        | <i>forZ</i> deletion strain                                                                                                                                                                                  |         |                                    | This work                        |
| <i>S. formicae</i> Δ <i>forJ</i> : ΦBT1 <i>forJ</i> <i>pforM</i>        | <i>forJ</i> complementation under <i>forM</i> promoter                                                                                                                                                       | pRD030  | Hyg <sup>R</sup>                   | This work                        |
| <i>S. formicae</i> Δ <i>forJ</i> : ΦBT1 <i>forJ</i>                     | <i>forJ</i> complementation under <i>forJ</i> promoter                                                                                                                                                       | pRD063  | Hyg <sup>R</sup>                   | This work                        |
| <i>S. formicae</i> Δ <i>forJ</i> : ΦBT1 <i>pErme*</i> <i>forJ</i>       | <i>forJ</i> complementation under <i>Erme*</i> promoter                                                                                                                                                      | pRD06   | Hyg <sup>R</sup>                   | This work                        |
| <i>S. formicae</i> Δ <i>forGF</i> : ΦBT1 <i>forGF</i>                   | <i>forGF</i> complementation under native promoter                                                                                                                                                           | pRD031  | Hyg <sup>R</sup>                   | This work                        |
| <i>S. formicae</i> Δ <i>for</i> : ΦC31 <i>for</i> 1-4 <i>aac(3)IV</i>   | Whole <i>for</i> cluster deletion complemented with pESAC-13 215-G with genes 1-4 (as annotated by AntiSMASH) replaced with apramycin gene                                                                   | pRD037  | Apr <sup>R</sup>                   | This work                        |
| <i>S. formicae</i> Δ <i>for</i> : ΦC31 <i>for</i> 1-7 <i>aac(3)IV</i>   | Whole <i>for</i> cluster deletion complemented with pESAC-13 215-G with genes 1-7 replaced with apramycin gene                                                                                               | pRD038  | Apr <sup>R</sup>                   | This work                        |
| <i>S. formicae</i> Δ <i>for</i> : ΦC31 <i>for</i> 32-43 <i>aac(3)IV</i> | Whole <i>for</i> cluster deletion complemented with pESAC-13 215-G with genes 32-43 replaced with apramycin gene                                                                                             | pRD039  | Apr <sup>R</sup>                   | This work                        |

|                                                                |                                                                                                                               |        |                  |                            |
|----------------------------------------------------------------|-------------------------------------------------------------------------------------------------------------------------------|--------|------------------|----------------------------|
| <i>S. formicae</i> $\Delta$ for:<br>ΦC31 for 36-43<br>aac(3)IV | Whole <i>for</i> cluster deletion<br>complemented with pESAC-<br>13 215-G with genes 36-43<br>replaced with apramycin<br>gene | pRD040 | Apr <sup>R</sup> | This work                  |
| <i>S. formicae</i> $\Delta$ forJ:<br>ΦBT1 forJ 3x Flag         | <i>forJ</i> deletion mutant<br>complemented in-trans with<br>3x flag-tagged <i>forJ</i> for ChIP                              | pRD034 | Hyg <sup>R</sup> | This work                  |
| <i>S. formicae</i> $\Delta$ forGF:<br>ΦBT1 forGF 3x Flag       | <i>forGF</i> deletion mutant<br>complemented in-trans with<br>3x flag-tagged <i>forGF</i> for<br>ChIP                         | pRD035 | Hyg <sup>R</sup> | This work                  |
| <i>S. formicae</i> $\Delta$ forZ:<br>ΦBT1 forZ 3x Flag         | <i>forZ</i> deletion mutant<br>complemented in-trans with<br>3x flag-tagged <i>forZ</i> for ChIP                              | pRD036 | Hyg <sup>R</sup> | This work                  |
| <i>S. formicae</i> $\Delta$ forV                               | <i>forV</i> deletion strain                                                                                                   |        |                  | (Qin <i>et al.</i> , 2017) |
| <i>S. formicae</i> $\Delta$ forX                               | <i>forX</i> deletion strain                                                                                                   |        |                  | (Qin <i>et al.</i> , 2020) |
| <i>S. formicae</i> $\Delta$ forY                               | <i>forY</i> deletion strain                                                                                                   |        |                  | (Qin <i>et al.</i> , 2020) |
| <i>S. formicae</i> $\Delta$ forS                               | <i>forS</i> deletion strain                                                                                                   |        |                  | (Qin <i>et al.</i> , 2019) |
| <i>S. formicae</i> $\Delta$ forJ,<br>$\Delta$ forV             | <i>forV</i> deletion strain with <i>forJ</i><br>deletion                                                                      |        |                  | This work                  |
| <i>S. formicae</i> $\Delta$ forJ,<br>$\Delta$ forX             | <i>forX</i> deletion strain with <i>forJ</i><br>deletion                                                                      |        |                  | This work                  |
| <i>S. formicae</i> $\Delta$ forJ,<br>$\Delta$ forY             | <i>forY</i> deletion strain with <i>forJ</i><br>deletion                                                                      |        |                  | This work                  |
| <i>S. formicae</i> $\Delta$ forJ,<br>$\Delta$ forS             | <i>forS</i> deletion strain with <i>forJ</i><br>deletion                                                                      |        |                  | This work                  |
| <i>S. formicae</i> : pMF96                                     | Wildtype strain with GUS<br>but no promoter controlling<br>expression (negative<br>control)                                   | pMF96  | Hyg <sup>R</sup> | This work                  |
| <i>S. formicae</i> : pMF23                                     | Wildtype strain with GUS<br>but no promoter controlling<br>expression (negative<br>control)                                   | pMF23  | Apr <sup>R</sup> | This work                  |
| <i>S. formicae</i> $\Delta$ forJ:<br>pMF96                     | <i>forJ</i> deletion strain with GUS<br>but no promoter controlling<br>expression (negative<br>control)                       | pMF96  | Hyg <sup>R</sup> | This work                  |
| <i>S. formicae</i> $\Delta$ forJ:<br>pMF23                     | <i>forJ</i> deletion e strain with<br>GUS but no promoter<br>controlling expression<br>(negative control)                     | pMF23  | Apr <sup>R</sup> | This work                  |
| <i>S. formicae</i> $\Delta$ forGF:<br>pMF96                    | <i>forGF</i> deletion strain with<br>GUS but no promoter<br>controlling expression<br>(negative control)                      | pMF96  | Hyg <sup>R</sup> | This work                  |
| <i>S. formicae</i> $\Delta$ forGF:<br>pMF23                    | <i>forGF</i> deletion e strain with<br>GUS but no promoter<br>controlling expression<br>(negative control)                    | pMF23  | Apr <sup>R</sup> | This work                  |
| <i>S. formicae</i> $\Delta$ forZ:<br>pMF96                     | <i>forZ</i> deletion strain with<br>GUS but no promoter                                                                       | pMF96  | Hyg <sup>R</sup> | This work                  |

|                                                                           |                                                                                                         |        |                  |           |
|---------------------------------------------------------------------------|---------------------------------------------------------------------------------------------------------|--------|------------------|-----------|
|                                                                           | controlling expression<br>(negative control)                                                            |        |                  |           |
| <i>S. formicae</i> $\Delta$ <i>forZ</i> :<br><i>pMF23</i>                 | <i>forZ</i> deletion strain with<br>GUS but no promoter<br>controlling expression<br>(negative control) | pMF23  | Apr <sup>R</sup> | This work |
| <i>S. formicae</i> $\Delta$ <i>forJ</i> :<br>$\Phi$ <i>BT1 GUS pforJ</i>  | <i>forJ</i> deletion strain with GUS<br>expressed under <i>pforJ</i>                                    | pRD062 | Hyg <sup>R</sup> | This work |
| <i>S. formicae</i> : $\Phi$ <i>BT1</i><br><i>GUS pforJ</i>                | Wildtype strain with GUS<br>expressed under <i>pforJ</i>                                                | pRD062 | Hyg <sup>R</sup> | This work |
| <i>S. formicae</i> : $\Phi$ <i>BT1</i><br><i>GUS pforG</i>                | Wildtype strain with GUS<br>expressed under <i>pforG</i>                                                | pRD054 | Hyg <sup>R</sup> | This work |
| <i>S. formicae</i> $\Delta$ <i>forGF</i> :<br>$\Phi$ <i>BT1 GUS pforG</i> | <i>forGF</i> deletion strain with<br>GUS expressed under <i>pforG</i>                                   | pRD054 | Hyg <sup>R</sup> | This work |
| <i>S. formicae</i> : $\Phi$ <i>BT1</i><br><i>GUS pforH</i>                | Wildtype strain with GUS<br>expressed under <i>pforH</i>                                                | pRD055 | Hyg <sup>R</sup> | This work |
| <i>S. formicae</i> $\Delta$ <i>forGF</i> :<br>$\Phi$ <i>BT1 GUS pforH</i> | <i>forGF</i> deletion strain with<br>GUS expressed under <i>pforH</i>                                   | pRD055 | Hyg <sup>R</sup> | This work |
| <i>S. formicae</i> : $\Phi$ <i>BT1</i><br><i>GUS pforZ</i>                | Wildtype strain with GUS<br>expressed under <i>pforZ</i>                                                | pRD058 | Hyg <sup>R</sup> | This work |
| <i>S. formicae</i> $\Delta$ <i>forZ</i> :<br>$\Phi$ <i>BT1 GUS pforZ</i>  | <i>forZ</i> deletion strain with<br>GUS expressed under <i>pforZ</i>                                    | pRD058 | Hyg <sup>R</sup> | This work |

**Table S4:** ePACs and plasmids used or generated in this study, related to **Experimental Model and subject details.**

| Plasmid          | Description                                                                                                                                       | Resistance                         | Reference                             |
|------------------|---------------------------------------------------------------------------------------------------------------------------------------------------|------------------------------------|---------------------------------------|
| pUZ8002          | RK2 derivative with a mutation in <i>oriT</i>                                                                                                     | Kan <sup>R</sup>                   | (Keiser <i>et al.</i> , 2000)         |
| pMS82            | <i>ori</i> , pUC18, <i>hyg</i> , <i>oriT</i> , RK2, int $\Phi$ BT1                                                                                | Hyg <sup>R</sup>                   | (Gregory, Till and Smith, 2003)       |
| pIJ773           | <i>aac(3)IV oriT bla</i>                                                                                                                          | Apr <sup>R</sup>                   | (Gust <i>et al.</i> , 2004)           |
| pR9604           | pUB307 derivative                                                                                                                                 | Carb <sup>R</sup>                  | (Piffaretti, Arini and Frey, 1988)    |
| pESAC-13 215-G   | <i>aphII</i> , <i>tsr</i>                                                                                                                         | Kan <sup>R</sup> /Tsr <sup>R</sup> | BioS&T and (Qin <i>et al.</i> , 2017) |
| pCRISPomyces-2   | <i>Apr<sup>R</sup></i> , <i>oriT</i> , <i>rep<sup>pSG5(ts)</sup></i> , <i>ori<sup>ColE1</sup></i> , <i>sSpcas9</i> , synthetic guide RNA cassette | Apr <sup>R</sup>                   | (Cobb, Wang and Zhao, 2015)           |
| pIJ10257         | <i>oriT</i> , $\Phi$ BT1 <i>attB-int</i> , <i>ermEp*</i> , pMS81 backbone                                                                         | Hyg <sup>R</sup>                   | (Hong <i>et al.</i> , 2005)           |
| pMF96            | $\Phi$ BT1 <i>attB-int</i> , <i>uidA</i> CDS, GUS plasmid                                                                                         | Hyg <sup>R</sup>                   | (Feeney <i>et al.</i> , 2017)         |
| pIJ10740 (pMF23) | $\Phi$ C31 <i>attB-int</i> , <i>ermEp*</i>                                                                                                        | Apr <sup>R</sup>                   | (Feeney <i>et al.</i> , 2017)         |
| pRD026           | pCRISPomyces-2 <i>forJ</i> flanking DNA and gRNA                                                                                                  | Apr <sup>R</sup>                   | This work                             |
| pRD027           | pCRISPomyces-2 <i>forGF</i> flanking DNA and gRNA                                                                                                 | Apr <sup>R</sup>                   | This work                             |
| pRD028           | pCRISPomyces-2 <i>ForZ</i> flanking DNA and gRNA                                                                                                  | Apr <sup>R</sup>                   | This work                             |

|        |                                                    |                                    |           |
|--------|----------------------------------------------------|------------------------------------|-----------|
| pRD030 | pMS82 <i>pforM</i><br>forJ                         | Hyg <sup>R</sup>                   | This work |
| pRD031 | pMS82 <i>pforG</i><br>forGF                        | Hyg <sup>R</sup>                   | This work |
| pRD032 | pMS82 <i>pforZ</i><br>forZ                         | Hyg <sup>R</sup>                   | This work |
| pRD034 | pMS82 <i>pforM</i><br><i>forJ 3x Flag</i>          | Hyg <sup>R</sup>                   | This work |
| pRD035 | pMS82 <i>pforG</i><br><i>forGF 3x Flag</i>         | Hyg <sup>R</sup>                   | This work |
| pRD036 | pMS82 <i>pforZ</i><br><i>forZ 3x Flag</i>          | Hyg <sup>R</sup>                   | This work |
| pRD037 | <i>pESAC-13 215-<br/>G 1-4 aac(3)IV<br/>oriT</i>   | Kan <sup>R</sup> /Tsr <sup>R</sup> | This work |
| pRD038 | <i>pESAC-13 215-<br/>G 1-7 aac(3)IV<br/>oriT</i>   | Kan <sup>R</sup> /Tsr <sup>R</sup> | This work |
| pRD039 | <i>pESAC-13 215-<br/>G 32-43<br/>aac(3)IV oriT</i> | Kan <sup>R</sup> /Tsr <sup>R</sup> | This work |
| pRD040 | <i>pESAC-13 215-<br/>G 36-43<br/>aac(3)IV oriT</i> | Kan <sup>R</sup> /Tsr <sup>R</sup> | This work |
| pRD054 | pMF96 <i>pforGF</i><br>GUS                         | Hyg <sup>R</sup>                   | This work |
| pRD055 | pMF96 <i>pforH</i><br>GUS                          | Hyg <sup>R</sup>                   | This work |
| pRD058 | pMF96 <i>pforZ</i><br>GUS                          | Hyg <sup>R</sup>                   | This work |
| pRD062 | pMF96 <i>pforJ</i><br>GUS                          | Hyg <sup>R</sup>                   | This work |



|        |                            |                  |           |
|--------|----------------------------|------------------|-----------|
| pRD063 | pMS82 <i>pforJ</i><br>forJ | Hyg <sup>R</sup> | This work |
| pRD064 | pIJ10257 forJ              | Hyg <sup>R</sup> | This work |

**Table S5:** Primers designed and used for this study (5'-3'), related to **Experimental Model and subject details**. Capital bases indicate overhangs, restriction sites etc.

| Primer name     | Description                                  | Sequence                                                |
|-----------------|----------------------------------------------|---------------------------------------------------------|
| pCRISP Test F   | Test XbaI site pCRISP2                       | aggctagtccgttatcaactgaaa                                |
| pCRISP Test R   | Test XbaI site pCRISP2                       | tcgccacctctgacttgagcgtcga                               |
| Spacer test     | Test BbsI site of pCRISP2                    | atacggctgccagataaggc                                    |
| ForJ For1       | Repair template <i>forJ</i> KO, left flank   | gctcggttgccccggcggtttttaTCTAGAggtgtgcgcgaagaacggcc      |
| ForJ Rev 1      | Repair template <i>forJ</i> KO, left flank   | GCTGCTGCGACCAGGCGAGCTCGCactgacgcggtcgttcccg             |
| ForJ For 2      | Repair template <i>forJ</i> KO, right flank  | GCGAGCTCGCCTGGTCGAGCAGCtgcgcttcgagaccgcc                |
| ForJ Rev 2      | Repair template <i>forJ</i> KO, right flank  | gcaacgcggccttttacggttctggccTCTAGAcctctcatgttctggtgggcc  |
| ForJ gRNA For   | sgRNA <i>forJ</i> deletion                   | ACGctgcgacaccttctccatga                                 |
| ForJ gRNA Rev   | sgRNA <i>forJ</i> deletion                   | AAAcctcatggagaaggtgctggca                               |
| ForJ KO Test 1F | Test <i>forJ</i> deletion in genome          | cctctcggtgagcgttcgagg                                   |
| ForJ KO Test 2R | Test <i>forJ</i> deletion in genome          | cctgttgacttcgcgaggc                                     |
| ForJ KO Test 2F | Test <i>forJ</i> deletion in genome          | gtaccaggaggacgtgcg                                      |
| ForJ KO Test 1R | Test <i>forJ</i> deletion in genome          | gccgacgcggcacttctatcc                                   |
| ForZ For1       | Repair template <i>forZ</i> KO, left flank   | gctcggttgccccggcggtttttaTCTAGAcgaacaggccgacgctgaacag    |
| ForZ Rev 1      | Repair template <i>forZ</i> KO, left flank   | GCTGCTGCGACCAGGCGAGCTCGCcatggcttgaagtccagcacgtcc        |
| ForZ For 2      | Repair template <i>forZ</i> KO, right flank  | GCGAGCTCGCCTGGTCGAGCAGCtcatccgtacctggcagctcgtcg         |
| ForZ Rev 2      | Repair template <i>forZ</i> KO, right flank  | gcaacgcggccttttacggttctggccTCTAGAccgaggcggacggatcgcgtcc |
| ForZ gRNA For   | sgRNA <i>forZ</i> deletion                   | ACGctgcggcggtcaactcgactg                                |
| ForZ gRNA Rev   | sgRNA <i>forZ</i> deletion                   | AAAcagtcgagttgaccgccgac                                 |
| ForZ KO Test 1F | Test <i>forZ</i> deletion in genome          | gccggtgccgaaccggagc                                     |
| ForZ KO Test 2R | Test <i>forZ</i> deletion in genome          | cgcacgccccacgacgagc                                     |
| ForZ KO Test 2F | Test <i>forZ</i> deletion in genome          | cgcacgccccacgacgagc                                     |
| ForZ KO Test 1R | Test <i>forZ</i> deletion in genome          | cgcacgccccacgacgagc                                     |
| ForGF For1      | Repair template <i>forGF</i> KO, left flank  | gctcggttgccccggcggtttttaTCTAGAggagccggtcttgccatctgc     |
| ForGF Rev 1     | Repair template <i>forGF</i> KO, left flank  | GCTGCTGCGACCAGGCGAGCTCGCggcagcctcgttcacagcagc           |
| ForGF For 2     | Repair template <i>forGF</i> KO, right flank | GCGAGCTCGCCTGGTCGAGCAGCtgaggctcaggcgggttcgatgg          |
| ForGF Rev 2     | Repair template <i>forGF</i> KO, right flank | gcaacgcggccttttacggttctggccTCTAGAcgagatcgtcatccacgcgcc  |
| ForGF gRNA For  | sgRNA <i>forGF</i> deletion                  | ACGctggcgaagatgttgcgaga                                 |

|                                   |                                                |                                                |
|-----------------------------------|------------------------------------------------|------------------------------------------------|
| ForGF gRNA Rev                    | sgRNA <i>forGF</i> deletion                    | AAACtctgcgcaacatcttcgcca                       |
| ForGF KO Test 1F                  | Test <i>forGF</i> deletion in genome           | gcagttcctggacgatgcgc                           |
| ForGF KO Test 1R                  | Test <i>forGF</i> deletion in genome           | cgagggtctggagaacgcgc                           |
| ForGF KO Test 2F                  | Test <i>forGF</i> deletion in genome           | cgctggcaccttctaccaccg                          |
| ForGF KO Test 2R                  | Test <i>forGF</i> deletion in genome           | gcctgcgtgattcatcgctg                           |
| pMS82 <i>forJ</i> <i>pforM</i> F1 | <i>forJ</i> complementation under <i>pforM</i> | gccgagaaccTAGGATCCAAGCTTgatgccggtgagcagggcgag  |
| pMS82 <i>forJ</i> <i>pforM</i> R1 | <i>forJ</i> complementation under <i>pforM</i> | ggcgcctgtgctgtggtcataccggctcccatcggttctg       |
| pMS82 <i>forJ</i> <i>pforM</i> F2 | <i>forJ</i> complementation under <i>pforM</i> | cagcaaccgatgggagccggtatgaccacgaccacggcgcc      |
| pMS82 <i>forJ</i> <i>pforM</i> R2 | <i>forJ</i> complementation under <i>pforM</i> | CTGGTACCATGCATAGATCTAAGCTTcgggagcggaccgtgcctag |
| pMS82 <i>forZ</i> F               | <i>forZ</i> complementation                    | gccgagaaccTAGGATCCAAGCTTccggtcaccaccattggag    |
| pMS82 <i>forZ</i> R               | <i>forZ</i> complementation                    | CTGGTACCATGCATAGATCTAAGCTTtaggagttgtgcgccctcgc |
| pMS82 <i>forGF</i> F              | <i>forGF</i> complementatio                    | gccgagaaccTAGGATCCAAGCTTcgtgtaccctctgtgcag     |
| pMS82 <i>forGF</i> R              | <i>forGF</i> complementatio                    | CTGGTACCATGCATAGATCTAAGCTTccgctgctcggccatcgaac |
| pMS82 TEST F                      | Test HindIII site pMS82                        | gcaacagtgccgttgcctgtctatg                      |
| pMS82 TEST R                      | Test HindIII site pMS82                        | gccagtggtattatgtaacaccgcc                      |
| ForJ-3xFLAG R                     | <i>forJ</i> 3xFlag for CHIP                    | gcctgaaccgcctccaccgtgccccgcgggcacctg           |
| ForJ-3xFLAG F                     | <i>forJ</i> 3xFlag for CHIP                    | cagggtcccgcggggcacgggtggaggcggttcaggc          |
| FLAG-pMS82 R                      | 3xFlag in pMS82                                | CTGGTACCATGCATAGATCTAAGCTTcaCTGTTCGTCATCGTCTTG |
| pMS82 ForF prom F                 | <i>forGF</i> 3xFlag for ChIP                   | gccgagaaccTAGGATCCAAGCTTcgtgtaccctctgtgcag     |
| ForF-prom R                       | <i>forGF</i> 3xFlag for ChIP                   | ggtcaccacggtctgcatagcagcctccccggttcg           |
| ForGF F                           | <i>forGF</i> 3xFlag for ChIP                   | cgaaccggggaggctgctatgcagaccgtggtgacc           |
| ForF-3xFLAG R                     | <i>forGF</i> 3xFlag for ChIP                   | gcctgaaccgcctccaccgccccggtgcacctcgcg           |
| FLAG-pMS82 F                      | 3xFlag in pMS82                                | cgcagggcgaccggggcggtggaggcggttcaggc            |
| ForZ-3xFLAG R                     | <i>forZ</i> 3xFlag for ChIP                    | gcctgaaccgcctccaccgctcgcacgcccaccg             |
| ForZ-3xFLAG F                     | <i>forZ</i> 3xFlag for ChIP                    | cggtggcggtgctgagcgggggtggaggcggttcaggc         |
| ForJ Test F                       | To check expression by RT-PCR                  | gcaaggcggcgagagcg                              |
| ForJ Test R                       | To check expression by RT-PCR                  | gccgacaccttctccatgagg                          |
| ForZ Test F                       | To check expression by RT-PCR                  | gaaccggagcagccgag                              |
| ForZ Test R                       | To check expression by RT-PCR                  | cctcgacgctgccacgag                             |
| ForF Test F                       | To check expression by RT-PCR                  | cctcgacgctgccacgag                             |
| ForF Test R                       | To check expression by RT-PCR                  | gcgaccagggtcatgacctcg                          |
| pMF96 HindIII Test For            | Test HindIII site of pMF96                     | gctcaatcaatcaccgatcc                           |
| pMF96 HindIII Test Rev            | Test HindIII site of pMF96                     | catgtccgtacctccgttg                            |
| 16S r RNA For                     | qPCR reference gene                            | cgggtctgcagtcgatacgg                           |

|                                   |                                                 |                                                 |
|-----------------------------------|-------------------------------------------------|-------------------------------------------------|
| 16S r RNA Rev                     | qPCR reference gene                             | gctttcgctcctcagcgtcag                           |
| MLK For                           | qPCR expression                                 | ctgatcttcggtgccttcctgtcc                        |
| MLK Rev                           | qPCR expression                                 | cggcgagcagtcagggtc                              |
| J For                             | qPCR expression                                 | ccgaccgtgcggaaactcg                             |
| J Rev                             | qPCR expression                                 | gtccggatccacatgccgc                             |
| HI For                            | qPCR expression                                 | ccttcgagttcgtcgtggacg                           |
| HI Rev                            | qPCR expression                                 | gctgctcggcgaccagatc                             |
| GF For                            | qPCR expression                                 | gctccaccactacgaacagcg                           |
| GF Rev                            | qPCR expression                                 | ggagcgagtcctcgtacacg                            |
| TSRABCDE For                      | qPCR expression                                 | cgacaccatcgacaccgcc                             |
| TSRABCDE Rev                      | qPCR expression                                 | cgttcactccacgaccacc                             |
| UVWXY For                         | qPCR expression                                 | gcagcttctccaggagttcc                            |
| UVWXY Rev                         | qPCR expression                                 | gccagaagatcctcagacgg                            |
| Z For                             | qPCR expression                                 | ctcatccggctcgtcacgc                             |
| Z Rev                             | qPCR expression                                 | cagatggcggttggcgagc                             |
| AA For                            | qPCR expression                                 | gaccggaggaacgcctgg                              |
| AA Rev                            | qPCR expression                                 | cggtgtcgaggtccttgctc                            |
| <i>pforH</i> -GF F For            | <i>pforG</i> in pMF96                           | AAAAAcatatggcgctgctcacggatcgc                   |
| <i>pforH</i> -GF Rev              | <i>pforG</i> in pMF96                           | AAAAAactcgaggcagcctcgttcacagcag                 |
| <i>pforZ</i> -AA F For            | <i>pforZ</i> in pMF96                           | AAAAAcatatggaatccctgacgcgccg                    |
| <i>pforZ</i> -AA F Rev            | <i>pforZ</i> in pMF96                           | AAAAAactcgaggacgatggtggtcgcagcac                |
| <i>forJ</i> pMF96 360 bp prom for | <i>pforJ</i> in pMF96                           | caattaatctagaggatccatagcctgttcgtcgcgggtggc      |
| <i>forJ</i> pMF96 360 bp prom rev | <i>pforJ</i> in pMF96                           | gtacctcgttgctcgtcactcaggttcgctcacctctgctgtgacg  |
| <i>pforGF</i> -H For              | <i>pforH</i> in pMF96                           | AAAAAcatatggcagcctcgttcacagcagc                 |
| <i>pforGF</i> -H Rev              | <i>pforH</i> in pMF96                           | AAAAAactcgaggcgtgctcacggatcgc                   |
| pMS82 <i>forJ</i> <i>pforJ</i> F1 | <i>forJ</i> complementation under <i>pforJ</i>  | gccgagaaccTAGGATCCAAGCTTcctgttcgtcgcgggtggc     |
| pMS82 <i>forJ</i> <i>pforJ</i> R1 | <i>forJ</i> complementation under <i>pforJ</i>  | ggcgccgtggtcgtggtcatgttcgctcacctctgctgtgacg     |
| pMS82 <i>forJ</i> <i>pforJ</i> F2 | <i>forJ</i> complementation under <i>pforJ</i>  | cgtcacagcagaggtgagcgaacatgaccacgaccacggcgcc     |
| pMS82 <i>forJ</i> <i>pforJ</i> R2 | <i>forJ</i> complementation under <i>pforJ</i>  | CTGGTACCATGCATAGATCTAAGCTTgccgaggcggaccgtgcctag |
| pIJ10257 <i>forJ</i> F            | <i>forJ</i> complementation under <i>pErmE*</i> | gtctagaacaggaggccccatgatgaccacgaccacggcg        |
| pIJ10257 <i>forJ</i> R            | <i>forJ</i> complementation under <i>pErmE*</i> | catgagaacctaggatccaagcttggaacgaccgctcagtgcc     |

**Figure S1.** Calibration curve for Fasamycin E and Formicamycin I, related to **Figure 2, Table 1 and Method Details: Titre Determination.**

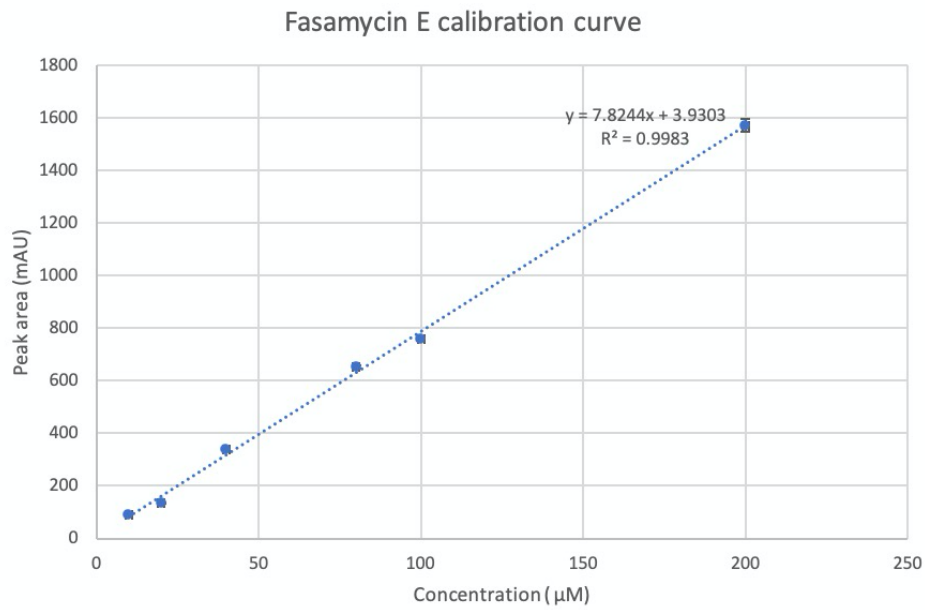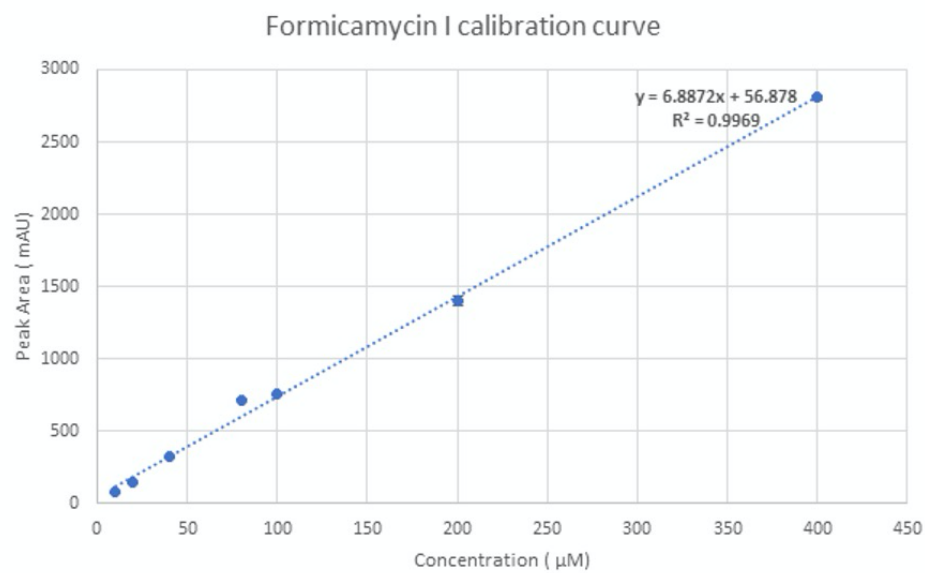

Supplement: mmc1.pdf [file mmc1.pdf]
